# Supplementary material for: The Rnf complex is a Na+ coupled respiratory enzyme in a fermenting bacterium, Thermotoga maritima
Source: Springer Nature journal article supplement (doi:10.1038/s42003-020-01158-y), 2020-08-07
Supplement: MOESM2 [file 42003_2020_1158_MOESM2_ESM.pdf]

## **Description of Additional Supplementary Files**

**File Name: Supplementary Data 1**

**Description:** Raw datapoints for all figures from the main text and supplementary information.
