# Supplementary material for: The Rnf complex is a Na+ coupled respiratory enzyme in a fermenting bacterium, Thermotoga maritima
Source: Commun Biol. 2020 Aug 7;3:431. doi: 10.1038/s42003-020-01158-y (PMC7414866; doi:10.1038/s42003-020-01158-y)
Supplement: Supplementary file 3 — Supplementarty Data 1 [file 42003_2020_1158_MOESM3_ESM.xlsx]

## Sheet: Fig. 2
A.						B
	Salt dependency of Rnf complex					DCCD inhibition of Rnf complex
	NAD:Fd oxidoreductase activity [U/mg]						NAD:Fd oxidoreductase activity [U/mg]
salt [mM]	NaCl	LiCl	KCl			DCCD [µM]	.+NaCl	.- NaCl
0.095	0.306	0.318	0.297			0	2	1.97
0.595	0.531	0.361				0.5		1.55
1.095	0.658	0.424	0.34			1		1.13
2.595	0.828	0.509	0.34			2.5	1.87	0.742
5.095	0.913	0.531	0.34			5	1.77	0.645
10.095	0.955	0.573	0.361			10	1.58	0.58
20.095	1.018	0.594	0.382
							NAD:Fd oxidoreductase activity [mU/mg]

## Sheet: Fig. 3
NaCl [mM]	ATP Hydrolosis [U/mg]
0.154	0.41	0.5				0.41
0.404	0.912	0.82	1.23			0.5
0.654	1.03	1.26	1.5
0.904	2.06	1.67	2.02
1.154	2.07	2.33	2.47
1.654	3.03	3.51	2.78
2.154	3.37	3.04	3.7
3.154	3.44	4.15	4.05
5.154	3.89	4.4	3.98
10.154	4.31	4.41

## Sheet: Fig. 4
	DCCD inhibiton of the ATPase
DCCD [µM]	.-NaCl			.+NaCl
0	7.5	6.8	7.15	7.5	6.8	7.15
0.25	5.2	5.4	6.2
0.75	4.6	5.1	4.9
2.5	3.4	3.6	3.45
5	1.8	2.3	2.5	7	6.9	7.1
10	1.8	1.7	1.7	6.4	6.5	6.5
20	1.5	1.7	1.6	6.3	5.9	6.15

## Sheet: Fig. 5
A	Sodium Translokation by ATPase				B	Sodium Translokation by Rnf complex
	Na in proteoliposomes [nmol/mg protein]					Na in proteoliposomes [nmol/mg protein]
Time [min]	.+ATP	.-ATP			Time [min]	.+NAD	.-NAD
0	12.22	13.67			0	10.65	13.22
2	14.21	15.1			2	14.19	15.06
4	15.47	16.16			4	16	14.45
5.5	21.85	15.6			5.5	16.67	17.49
6.5	25.42	15.29			6.5	21.75	16.44
7.5	27.28	16.85			7.5	25.63	19.62
8.5	24.09				8.5	29.53	18.09
11	25.95	16.53			11	32.6
14	25.83				14	34.48	21.02

## Sheet: Fig. 6
A	Salt dependentcy purified Rnf complex							B	DCCD inhibition of the purified Rnf complex
	NAD:Fd oxidoreductase activity [U/mg]								NAD:Fd oxidoreductase activity [U/mg]
	sodium		potassium		lithium			DCCD [µM]	.-NaCl			.+NaCl
0.085	0.948767	0.759013						0	2.13	2.19		1.94	1.97
0.185	1.2334	1.42315						1	2.23	2.19		1.89	2.05
0.285	1.80266	1.89753						2	1.71	1.87		2.31	1.9
0.385	2.27704	1.89753						5	1.61	1.65		2.1	2.03
0.585	2.37192	2.56167						10	1.53	1.48		2.06	2.05
1.085	2.94118	3.03605						25	1.42	1.53		2.02	1.9
5.085	3.70019	3.70019
10.085	3.41556	3.51044
0			0.948767	0.759013	0.948767	0.759013
0.1			1.2334	1.32827	1.27135	1.70778
0.2			1.17647	0.948767	1.42315	1.65085
0.3			0.948767	1.32827	1.51803	1.4611
0.5			1.2334	0.948767	1.99241	1.51803
1			1.04364	1.2334	1.42315	1.6129
5			0.85389	1.32827	1.6129	1.6129
10			0.85389	1.04364	1.80266	2.18216

## Sheet: Fig. 7
	Sodium Translokation of the Rnf complex
	Na in proteoliposomes [nmol/mg protein]
Time [min]	.+NAD	.-NAD
0	5.83763	4.90641
2	5.15169	4.91336
4	4.6551	6.64279
5.5	5.53038	5.38661
7.5	5.46607	5.37965
10	6.99872	5.24046
13	7.97761	5.48056
16	8.50278	5.32049
20	9.91039	6.4166

## Sheet: Fig. 8
	Effect of ionophores at the Na traslocation by the Rnf complex
	Na in proteoliposomes [nmol/mg protein]
Time [min]	TCS	ETH2120
0	24.1424	29.0593
2	28.1124	8.43638
4	20.9992	9.76444
5.5	29.8938	8.65285
7.5	39.068	7.52956
10	34.0523	6.85091
13	34.7028	7.18438
16	43.7129	8.21407
20	52.2548	8.93367

## Sheet: SFig. 1
Time(s)	with NAD	wothout NAD
1.4	0.832396	0.858278
2	0.832242	0.849456
3	0.832319	0.845217
4	0.832324	0.843042
5	0.831762	0.842668
6	0.83169	0.84249
7	0.832149	0.842744
8	0.831585	0.843309
9	0.831756	0.841848
10	0.831909	0.842594
11	0.831767	0.843101
12	0.832292	0.842662
13	0.832552	0.842658
14	0	0.842129
15		0.842047
16		0.842426
17		0.842428
18		0.845055
19		0.845217
20		0.843042
21	0	0.842668
22	0.904972	0.84249
23	0.903726	0.842744
24	0.901396	0.843309
25	0.89982	0.841848
26	0.899934	0.842594
27	0.900119	0.843101
28	0.899781	0.842662
29	0.900115	0.842658
30	0.899077	0.853263
31	0.900117	0.852481
32	0.900487	0.852188
33	0.899815	0.85116
34	0.90035	0.852417
35	0.899488	0.851793
36	0.899496	0.850907
37	0.899655	0.849615
38	0.89927	0.846766
39	0.898998	0.847588
40	0.898678	0.847656
41	0.898414	0.848155
42	0.89797	0.849527
43	0.899165	0.848277
44	0	0.84751
45		0.848492
46		0.848422
47		0.847008
48		0.847725
49		0.645825
50		0.646248
51	0	0.646793
52	0.917332	0.645782
53	0.913361	0.645119
54	0.911821	0.6459
55	0.911369	0.645297
56	0.910778	0.647045
57	0.910225	0.873829
58	0.910138	0.868398
59	0.910583	0.865991
60	0.910101	0.864414
61	0.909204	0.863543
62	0.908577	0.864119
63	0.908224	0.861809
64	0.907393	0.861707
65	0.907074	0.862179
66	0.907777	0.860703
67	0.90754	0.860137
68	0.906604	0.859379
69	0.907072	0.858975
70	0.906779	0.858325
71	0.907083	0.857467
72	0.905735	0.857784
73	0.906018	0.857903
74	0.906429	0.858407
75	0.90743	0.858672
76	0.907668	0.858383
77	0.906914	0.858399
78	0.867647	0.859218
79	0	0.859166
80		0.859066
81		0.858622
82		0.859317
83		0.860323
84		0.645825
85		0.646248
86	0	0.646793
87	0.967104	0.645782
88	0.965308	0.645119
89	0.965726	0.6459
90	0.967573	0.645297
91	0.969626	0.647045
92	0.972742	0.873829
93	0.973542	0.860458
94	0.975351	0.859376
95	0.97803	0.858982
96	0.979252	0.859918
97	0.980833	0.860211
98	0.982369	0.860458
99	0.984307	0.859152
100	0.985734	0.859781
101	0.98729	0.86046
102	0.989242	0.85859
103	0.991909	0.858631
104	0.994248	0.858931
105	0.996482	0.859537
106	0.997791	0.859318
107	1.00024	0.859317
108	1.00306	0.858757
109	1.00525	0.858704
110	1.00746	0.858514
111	1.00884	0.858923
112	1.0118	0.858288
113	1.01486	0.859534
114	1.01719	0.858929
115	1.01826	0.860152
116	1.0197	0.857829
117	1.02263	0.857603
118	1.02497	0.857688
119	1.02652	0.857847
120	1.02821	0.858899
121	1.03045	0.859895
122	1.03306	0.859359
123	1.03403	0.859633
124	1.03587	0.860026
125	1.03794	0.859847
126	1.0408	0.859087
127	1.04292	0.858465
128	1.04456	0.857903
129	1.04666	0.85816
130	1.04857	0.858168
131	1.05026	0.858318
132	1.05288	0.85885
133	1.05428	0.858956
134	1.0571	0.859096
135	1.05914	0.858592
136	1.06177	0.858696
137	1.06213	0.858454
138	1.06419	0.85851
139	1.06637	0.858468
140	1.06779	0.857304
141	1.07127	0.857625
142	1.07405	0.858764
143	1.07552	0.859977
144	1.0781	0.85953
145	1.08071	0.859726
146	1.08273	0.859434
147	1.08365	0.859723
148	1.08569	0.859539
149	1.08733	0.859243
150	1.08901	0.859708
151	1.09153	0.859833
152	1.09302	0.859528
153	1.09595	0.859154
154	1.09888	0.859631
155	1.10067	0.858917
156	1.10244	0.859221
157	1.1042	0.859603
158	1.1063	0.858642
159	1.10842	0.858979
160	1.11008	0.859761
161	1.11132	0.859624
162	1.11386	0.858938
163	1.11693	0.859417
164	1.11952	0.859617
165	1.12109	0.859674
166	1.12342	0.859998
167	1.12555	0.859533
168	1.12755	0.860409
169	1.13013	0.860426
170	1.132	0.860721
171	1.13429	0.860852
172	1.13582	0.859307
173	1.13835	0.859862
174	1.14001	0.859826
175	1.14217	0.859563
176	1.14421	0.858946
177	1.14642	0.85939
178	1.14821	0.858864
179	1.14994	0.859294
180	1.15265	0.858853
181	1.15513	0.859086
182	1.15678	0.859433
183	1.15805	0.859528
184	1.16095	0.859154
185	1.16326	0.859631
186	1.16601	0.858917
187	1.16789	0.859221
188	1.16968	0.859603
189	1.17216	0.858642
190	1.17403	0.858979
191	1.17662	0.859761
192	1.17853	0.859624
193	1.17942	0.858938
194	1.18192	0.859417
195	1.18398	0.859617
196	1.18594	0.859674
197	1.18735	0.859998
198	1.18945	0.859533
199	1.19193	0.860409
200	1.19367	0.860426
201	1.19544	0.860721
202	1.19798	0.860852

## Sheet: SFig. 2
Elutionsvolume [ml]	A280 [mAu]	dotted line
0	-0.15
0.17	-0.16
0.35	-0.16
0.52	-0.05
0.7	-0.16
0.87	-0.26
1.05	-0.32
1.22	-0.4
1.4	-0.47
1.57	-0.55
1.75	-0.62
1.92	-0.68
2.1	-0.74
2.27	-0.8
2.45	-0.86
2.62	-0.93
2.79	-0.99
2.97	-1.03
3.14	-1.1
3.32	-1.16
3.49	-1.2
3.67	-1.29
3.84	-1.33
4.02	-1.36
4.19	-1.39
4.37	-1.44
4.54	-1.48
4.72	-1.52
4.89	-1.56
5.07	-1.59
5.24	-1.62
5.41	-1.64
5.59	-1.68
5.76	-1.7
5.94	-1.73
6.11	-1.75
6.29	-1.78
6.46	-1.79
6.64	-1.81
6.81	-1.82
6.99	-1.85
7.16	-1.86
7.34	-1.87
7.51	-1.88
7.69	-1.9
7.86	-1.91
8.03	-1.92
8.21	-1.93
8.38	-1.94
8.56	-1.95
8.73	-1.96
8.91	-1.96
9.08	-1.97
9.26	-1.98
9.43	-1.98
9.61	-1.99
9.78	-1.99
9.96	-2
10.13	-2
10.3	-2
10.48	-2
10.65	-2
10.83	-2
11	-2
11.18	-2
11.35	-1.98
11.53	-1.95
11.7	-1.96
11.88	-1.98
12.05	-1.99
12.23	-1.98
12.4	-1.98
12.58	-1.99
12.75	-1.99
12.92	-1.99
13.1	-2
13.27	-1.99
13.45	-1.99
13.62	-2
13.8	-2
13.97	-2
14.15	-2
14.32	-2
14.5	-2
14.67	-2.01
14.85	-2.01
15.02	-2.01
15.2	-2.02
15.37	-2.02
15.54	-2.03
15.72	-2.03
15.89	-2.03
16.07	-2.04
16.24	-2.05
16.42	-2.05
16.59	-2.05
16.77	-2.05
16.94	-2.05
17.12	-2.05
17.29	-2.06
17.47	-2.06
17.64	-2.06
17.82	-2.07
17.99	-2.07
18.16	-2.07
18.34	-2.07
18.51	-2.08
18.69	-2.08
18.86	-2.08
19.04	-2.09
19.21	-2.08
19.39	-2.08
19.56	-2.08
19.74	-2.08
19.91	-2.09
20.09	-2.09
20.26	-2.09
20.44	-2.09
20.61	-2.08
20.78	-2.09
20.96	-2.1
21.13	-2.1
21.31	-2.09
21.48	-2.09
21.66	-2.1
21.83	-2.1
22.01	-2.11
22.18	-2.1
22.36	-2.11
22.53	-2.11
22.71	-2.11
22.88	-2.12
23.06	-2.12
23.23	-2.12
23.4	-2.13
23.58	-2.12
23.75	-2.13
23.93	-2.13
24.1	-2.13
24.28	-2.14
24.45	-2.13
24.63	-2.14
24.8	-2.14
24.98	-2.15
25.15	-2.14
25.33	-2.15
25.5	-2.15
25.68	-2.15
25.85	-2.16
26.02	-2.16
26.2	-2.17
26.37	-2.16
26.55	-2.17
26.72	-2.16
26.9	-2.17
27.07	-2.17
27.25	-2.17
27.42	-2.18
27.6	-2.18
27.77	-2.18
27.95	-2.18
28.12	-2.18
28.29	-2.18
28.47	-2.18
28.64	-2.19
28.82	-2.19
28.99	-2.19
29.17	-2.19
29.34	-2.19
29.52	-2.19
29.69	-2.2
29.87	-2.19
30.04	-2.21
30.22	-2.21
30.39	-2.21
30.57	-2.22
30.74	-2.21
30.91	-2.21
31.09	-2.2
31.26	-2.21
31.44	-2.2
31.61	-2.21
31.79	-2.21
31.96	-2.21
32.14	-2.21
32.31	-2.22
32.49	-2.21
32.66	-2.22
32.84	-2.23
33.01	-2.21
33.19	-2.22
33.36	-2.22
33.53	-2.21
33.71	-2.22
33.88	-2.21
34.06	-2.21
34.23	-2.22
34.41	-2.21
34.58	-2.2
34.76	-2.2
34.93	-2.19
35.11	-2.18
35.28	-2.17
35.46	-2.14
35.63	-2.11
35.81	-2.08
35.98	-2.04
36.15	-1.98
36.33	-1.89
36.5	-1.78
36.68	-1.6
36.85	-1.33
37.03	-0.95
37.2	-0.36
37.38	0.54
37.55	1.91
37.73	4.05
37.9	7.14
38.08	11.38
38.25	17.29
38.43	25.34
38.6	35.55
38.77	46.72
38.95	57.39
39.12	66.43
39.3	73.82
39.47	80.97
39.65	88.03
39.82	96.22
40	104.54	0
40.17	113.55
40.35	123.75
40.52	135.51
40.7	150.68
40.87	168.99
41.05	191.66
41.22	219.75
41.39	252.52
41.57	290.66
41.74	330.51
41.92	370.04
42.09	407.44
42.27	441.11
42.44	471.89	10
42.62	499.19
42.79	523.76
42.97	546.1
43.14	565.74
43.32	584.08
43.49	600.13	150
43.66	614.44
43.84	625.53
44.01	632.16
44.19	636.64
44.36	639.47	540
44.54	642.72
44.71	645.92
44.89	648.56
45.06	652.18
45.24	654.11
45.41	656.24
45.59	657.32
45.76	658.15
45.94	658.91	600
46.11	658.75
46.28	658.78
46.46	658.09
46.63	657.25
46.81	655.41
46.98	653.05
47.16	650.51
47.33	646.51
47.51	642.45
47.68	637.8
47.86	633.08
48.03	627.84	520
48.21	622.12
48.38	616.57
48.56	610.34
48.73	603.82
48.9	597.7
49.08	590.51	440
49.25	583.72
49.43	576.14
49.6	568.99
49.78	561.4
49.95	553.43
50.13	545.71	360
50.3	537.14
50.48	528.94
50.65	520.59
50.83	511.75
51	503.37
51.18	494.12
51.35	485.29
51.52	475.85
51.7	466.74
51.87	458
52.05	448.62
52.22	440.41
52.4	431.61
52.57	423.08	220
52.75	414.61
52.92	405.87
53.1	398.09
53.27	389.69
53.45	382.19
53.62	374.3
53.8	366.58
53.97	359.16
54.14	351.49	20
54.32	344.31
54.49	337.14
54.67	330.07
54.84	322.94
55.02	315.57	0
55.19	308.54
55.37	301.15
55.54	293.96
55.72	286.64
55.89	279.11
56.07	271.89
56.24	264.13
56.42	256.53
56.59	248.59
56.76	240.57
56.94	232.75
57.11	224.4
57.29	216.38
57.46	208
57.64	200
57.81	192.05
57.99	183.91
58.16	176.27
58.34	168.3
58.51	160.93
58.69	153.79
58.86	146.69
59.04	140.08
59.21	133.42
59.38	127.39
59.56	121.57
59.73	115.9
59.91	110.74
60.08	105.58
60.26	101.03
60.43	96.6
60.61	92.41
60.78	88.6
60.96	84.9
61.13	81.54
61.31	78.33
61.48	75.29
61.65	72.53
61.83	69.84
62	67.42
62.18	65.12
62.35	62.97
62.53	61
62.7	59.08
62.88	57.33
63.05	55.65
63.23	54.08
63.4	52.62
63.58	51.2
63.75	49.92
63.93	48.64
64.1	47.47
64.27	46.33
64.45	45.22
64.62	44.2
64.8	43.17
64.97	42.21
65.15	41.23
65.32	40.29
65.5	39.38
65.67	38.47
65.85	37.57
66.02	36.7
66.2	35.83
66.37	34.97
66.55	34.12
66.72	33.28
66.89	32.46
67.07	31.65
67.24	30.86
67.42	30.08
67.59	29.33
67.77	28.6
67.94	27.89
68.12	27.2
68.29	26.55
68.47	25.92
68.64	25.31
68.82	24.72
68.99	24.19
69.17	23.65
69.34	23.14
69.51	22.65
69.69	22.18
69.86	21.73
70.04	21.3
70.21	20.89
70.39	20.48
70.56	20.08
70.74	19.7
70.91	19.33
71.09	18.96
71.26	18.61
71.44	18.25
71.61	17.91
71.79	17.57
71.96	17.23
72.13	16.9
72.31	16.59
72.48	16.26
72.66	15.93
72.83	15.63
73.01	15.32
73.18	15.03
73.36	14.74
73.53	14.47
73.71	14.22
73.88	13.96
74.06	13.72
74.23	13.49
74.41	13.28
74.58	13.07
74.75	12.87
74.93	12.67
75.1	12.49
75.28	12.31
75.45	12.12
75.63	11.95
75.8	11.78
75.98	11.6
76.15	11.43
76.33	11.25
76.5	11.08
76.68	10.9
76.85	10.72
77.03	10.53
77.2	10.33
77.37	10.15
77.55	9.96
77.72	9.75
77.9	9.19
78.07	9.17
78.25	9.01
78.42	8.79
78.6	8.59
78.77	8.38
78.95	8.18
79.12	7.98
79.3	7.8
79.47	7.62
79.64	7.45
79.82	7.29
79.99	7.14
80.17	7
80.34	6.86
80.52	6.74
80.69	6.61
80.87	6.51
81.04	6.4
81.22	6.31
81.39	6.23
81.57	6.15
81.74	6.09
81.92	6.03
82.09	5.98
82.26	5.91
82.44	5.88
82.61	5.84
82.79	5.8
82.96	5.76
83.14	5.72
83.31	5.69
83.49	5.65
83.66	5.63
83.84	5.6
84.01	5.55
84.19	5.52
84.36	5.49
84.54	5.46
84.71	5.42
84.88	5.38
85.06	5.35
85.23	5.3
85.41	5.26
85.58	5.22
85.76	5.18
85.93	5.14
86.11	5.11
86.28	5.08
86.46	5.04
86.63	5
86.81	4.98
86.98	4.96
87.16	4.93
87.33	4.9
87.5	4.87
87.68	4.85
87.85	4.84
88.03	4.8
88.2	4.79
88.38	4.76
88.55	4.73
88.73	4.7
88.9	4.65
89.08	4.62
89.25	4.57
89.43	4.52
89.6	4.47
89.78	4.4
89.95	4.34
90.12	4.27
90.3	4.21
90.47	4.14
90.65	4.05
90.82	3.99
91	3.91
91.17	3.85
91.35	3.78
91.52	3.71
91.7	3.66
91.87	3.61
92.05	3.55
92.22	3.49
92.4	3.43
92.57	3.39
92.74	3.34
92.92	3.29
93.09	3.24
93.27	3.19
93.44	3.15
93.62	3.1
93.79	3.06
93.97	3.01
94.14	2.98
94.32	2.94
94.49	2.9
94.67	2.86
94.84	2.84
95.01	2.8
95.19	2.75
95.36	2.72
95.54	2.7
95.71	2.65
95.89	2.64
96.06	2.61
96.24	2.58
96.41	2.55
96.59	2.54
96.76	2.51
96.94	2.49
97.11	2.48
97.29	2.46
97.46	2.45
97.63	2.43
97.81	2.42
97.98	2.41
98.16	2.41
98.33	2.41
98.51	2.39
98.68	2.4
98.86	2.4
99.03	2.4
99.21	2.38
99.38	2.39
99.56	2.41
99.73	2.4
99.91	2.41
100.08	2.41
100.25	2.41
100.43	2.42
100.6	2.43
100.78	2.43
100.95	2.44
101.13	2.44
101.3	2.44
101.48	2.45
101.65	2.47
101.83	2.47
102	2.47
102.18	2.47
102.35	2.48
102.53	2.48
102.7	2.48
102.87	2.48
103.05	2.48
103.22	2.48
103.4	2.47
103.57	2.46
103.75	2.46
103.92	2.45
104.1	2.45
104.27	2.42
104.45	2.43
104.62	2.41
104.8	2.4
104.97	2.39
105.15	2.37
105.32	2.35
105.49	2.35
105.67	2.33
105.84	2.32
106.02	2.3
106.19	2.28
106.37	2.26
106.54	2.25
106.72	2.24
106.89	2.21
107.07	2.2
107.24	2.17
107.42	2.15
107.59	2.12
107.77	2.11
107.94	2.08
108.11	2.06
108.29	2.04
108.46	2.02
108.64	2.01
108.81	1.99
108.99	1.97
109.16	1.96
109.34	1.95
109.51	1.94
109.69	1.94
109.86	1.92
110.04	1.91
110.21	1.91
110.39	1.88
110.56	1.86
110.73	1.85
110.91	1.84
111.08	1.81
111.26	1.8
111.43	1.8
111.61	1.77
111.78	1.74
111.96	1.73
112.13	1.7
112.31	1.68
112.48	1.66
112.66	1.63
112.83	1.6
113	1.58
113.18	1.55
113.35	1.52
113.53	1.49
113.7	1.47
113.88	1.44
114.05	1.43
114.23	1.41
114.4	1.38
114.58	1.35
114.75	1.34
114.93	1.31
115.1	1.3
115.28	1.28
115.45	1.27
115.62	1.25
115.8	1.24
115.97	1.22
116.15	1.22
116.32	1.2
116.5	1.18
116.67	1.19
116.85	1.18
117.02	1.15
117.2	1.16
117.37	1.15
117.55	1.14
117.72	1.14
117.9	1.13
118.07	1.13
118.24	1.12
118.42	1.13
118.59	1.13
118.77	1.13
118.94	1.14
119.12	1.13
119.29	1.14
119.47	1.15
119.64	1.15
119.82	1.16
119.99	1.16
120.17	1.17
120.34	1.18
120.52	1.18
120.69	1.2
120.86	1.22
121.04	1.24
121.21	1.25
121.39	1.27
121.56	1.27
121.74	1.29
121.91	1.31
122.09	1.33
122.26	1.34
122.44	1.35
122.61	1.36
122.79	1.37
122.96	1.38
123.14	1.39
123.31	1.38
123.48	1.38
123.66	1.38
123.83	1.37
124.01	1.35
124.18	1.34
124.36	1.33
124.53	1.31
124.71	1.29
124.88	1.26
125.06	1.24
125.23	1.22
125.41	1.18
125.58	1.15
125.76	1.13
125.93	1.1
126.1	1.08
126.28	1.07
126.45	1.05
126.63	1.03
126.8	1.01
126.98	0.99
127.15	0.98
127.33	0.97
127.5	0.97
127.68	0.97
127.85	0.98
128.03	0.97
128.2	0.98
128.38	0.98
128.55	0.99
128.72	1
128.9	1.03
129.07	1.04
129.25	1.05
129.42	1.07
129.6	1.1
129.77	1.11
129.95	1.13
130.12	1.16
130.3	1.18
130.47	1.2
130.65	1.22
130.82	1.23
130.99	1.25
131.17	1.27
131.34	1.27
131.52	1.28
131.69	1.27
131.87	1.27
132.04	1.26
132.22	1.25
132.39	1.23
132.57	1.19
132.74	1.14
132.92	1.1
133.09	1.04
133.27	0.99
133.44	0.92
133.61	0.85
133.79	0.77
133.96	0.69
134.14	0.61
134.31	0.52
134.49	0.44
134.66	0.35
134.84	0.27
135.01	0.18
135.19	0.1
135.36	0.02
135.54	-0.05
135.71	-0.12
135.89	-0.17
136.06	-0.22
136.23	-0.26
136.41	-0.29
136.58	-0.33
136.76	-0.34
136.93	-0.35
137.11	-0.34
137.28	-0.31
137.46	-0.29
137.63	-0.25
137.81	-0.21
137.98	-0.15
138.16	-0.09
138.33	-0.03
138.51	0.05
138.68	0.12
138.85	0.21
139.03	0.28
139.2	0.37
139.38	0.44
139.55	0.53
139.73	0.62
139.9	0.69
140.08	0.78
140.25	0.85
140.43	0.92
140.6	0.97
140.78	1.04
140.95	1.11
141.13	1.17
141.3	1.21
141.47	1.26
141.65	1.3
141.82	1.34
142	1.37
142.17	1.41
142.35	1.45
142.52	1.47
142.7	1.49
142.87	1.51
143.05	1.53
143.22	1.55
143.4	1.56
143.57	1.59
143.75	1.6
143.92	1.62
144.09	1.63
144.27	1.64
144.44	1.66
144.62	1.67
144.79	1.69
144.97	1.7
145.14	1.7
145.32	1.72
145.49	1.74
145.67	1.74
145.84	1.75
146.02	1.76
146.19	1.78
146.36	1.78
146.54	1.78
146.71	1.78
146.89	1.78
147.06	1.79
147.24	1.79
147.41	1.79
147.59	1.78
147.76	1.78
147.94	1.77
148.11	1.77
148.29	1.76
148.46	1.75
148.64	1.75
148.81	1.73
148.98	1.72
149.16	1.72
149.33	1.7
149.51	1.68
149.68	1.67
149.86	1.66
150.03	1.65
150.21	1.64
150.38	1.63
150.56	1.62
150.73	1.6
150.91	1.6
151.08	1.59
151.26	1.58
151.43	1.58
151.6	1.57
151.78	1.57
151.95	1.57
152.13	1.57
152.3	1.57
152.48	1.57
152.65	1.56
152.83	1.56
153	1.56
153.18	1.55
153.35	1.56
153.53	1.56
153.7	1.56
153.88	1.57
154.05	1.57
154.22	1.56
154.4	1.57
154.57	1.57
154.75	1.57
154.92	1.58
155.1	1.58
155.27	1.57
155.45	1.59
155.62	1.59
155.8	1.59
155.97	1.6
156.15	1.6
156.32	1.61
156.5	1.6
156.67	1.6
156.84	1.61
157.02	1.6
157.19	1.6
157.37	1.6
157.54	1.61
157.72	1.61
157.89	1.61
158.07	1.61
158.24	1.61
158.42	1.61
158.59	1.62
158.77	1.59
158.94	1.6
159.12	1.61
159.29	1.61
159.46	1.61
159.64	1.6
159.81	1.61
159.99	1.59
160.16	1.59
160.34	1.6
160.51	1.59
160.69	1.59
160.86	1.6
161.04	1.59
161.21	1.57
161.39	1.58
161.56	1.57
161.74	1.56
161.91	1.56
162.08	1.56
162.26	1.56
162.43	1.56
162.61	1.55
162.78	1.55
162.96	1.54
163.13	1.54
163.31	1.54
163.48	1.53
163.66	1.53
163.83	1.53
164.01	1.52
164.18	1.51
164.35	1.51
164.53	1.5
164.7	1.5
164.88	1.49
165.05	1.49
165.23	1.48
165.4	1.47
165.58	1.46
165.75	1.45
165.93	1.44
166.1	1.44
166.28	1.44
166.45	1.43
166.63	1.43
166.8	1.4
166.97	1.4
167.15	1.39
167.32	1.38
167.5	1.37
167.67	1.36
167.85	1.34
168.02	1.34

## Sheet: SFig. 4
Temperature [°C]	NADH:MV oxidoreductase activity [U/mg]
30	5.8	6.3
40	10.3	11.1
50	15.3	15.6
60	24.5	23.9
70	34.3	26.7
80	43.9	44.2
90	53.7	49

[truncated: 1 more sheets: SFig. 5]
